# Supplementary material for: Comparison of the Patency and Regenerative Potential of Biodegradable Vascular Prostheses of Different Polymer Compositions in an Ovine Model
Source: MDPI journal article supplement (doi:10.3390/ijms24108540), 2023-05-10
Supplement: s1 [file s1]

Supplementary Figure S1

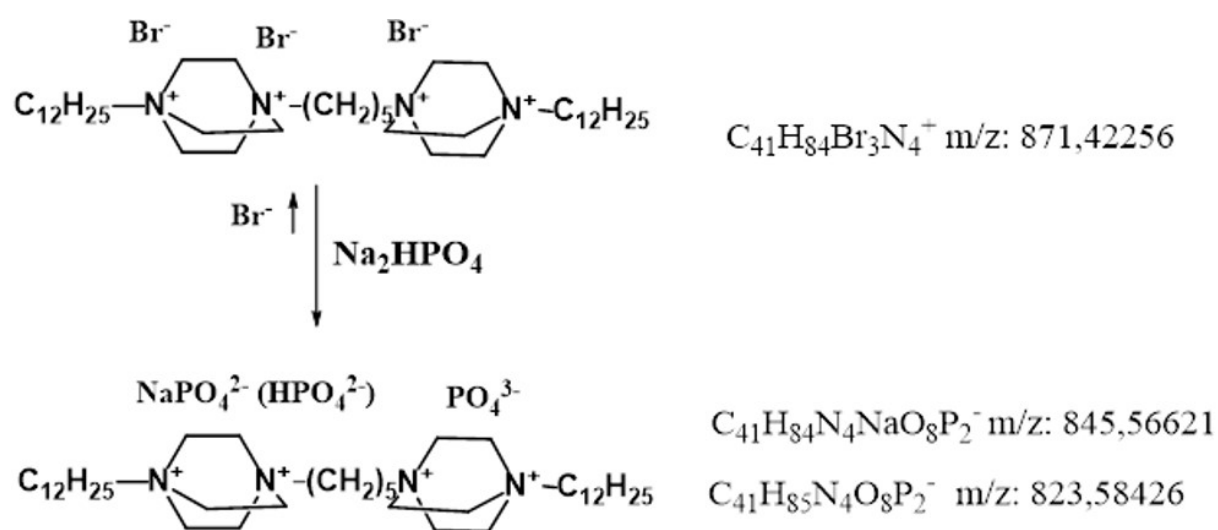

**Supplementary Figure S1.** Chemical structure of cationic amphiphile 1,5-bis-(4-tetradecyl-1,4-diazoniabicyclo[2.2.2]octan-1-yl)pentane tetrabromide after incubation in phosphate-buffered saline.

Supplementary Figure S2

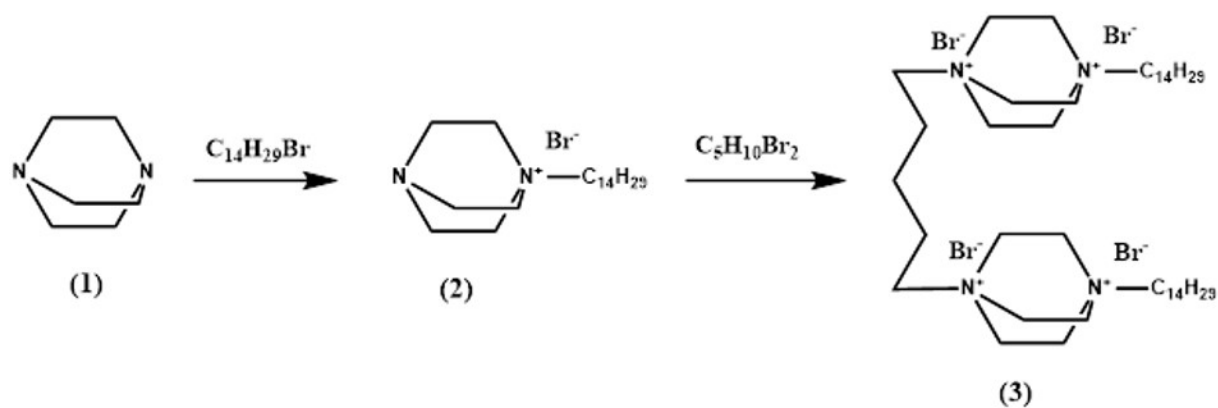

**Supplementary Figure S2.** Scheme of the synthesis of 1,5-bis-(4-tetradecyl-1,4-diazoniabicyclo[2.2.2]octan-1-yl)pentane tetrabromide.

Supplementary Figure S3

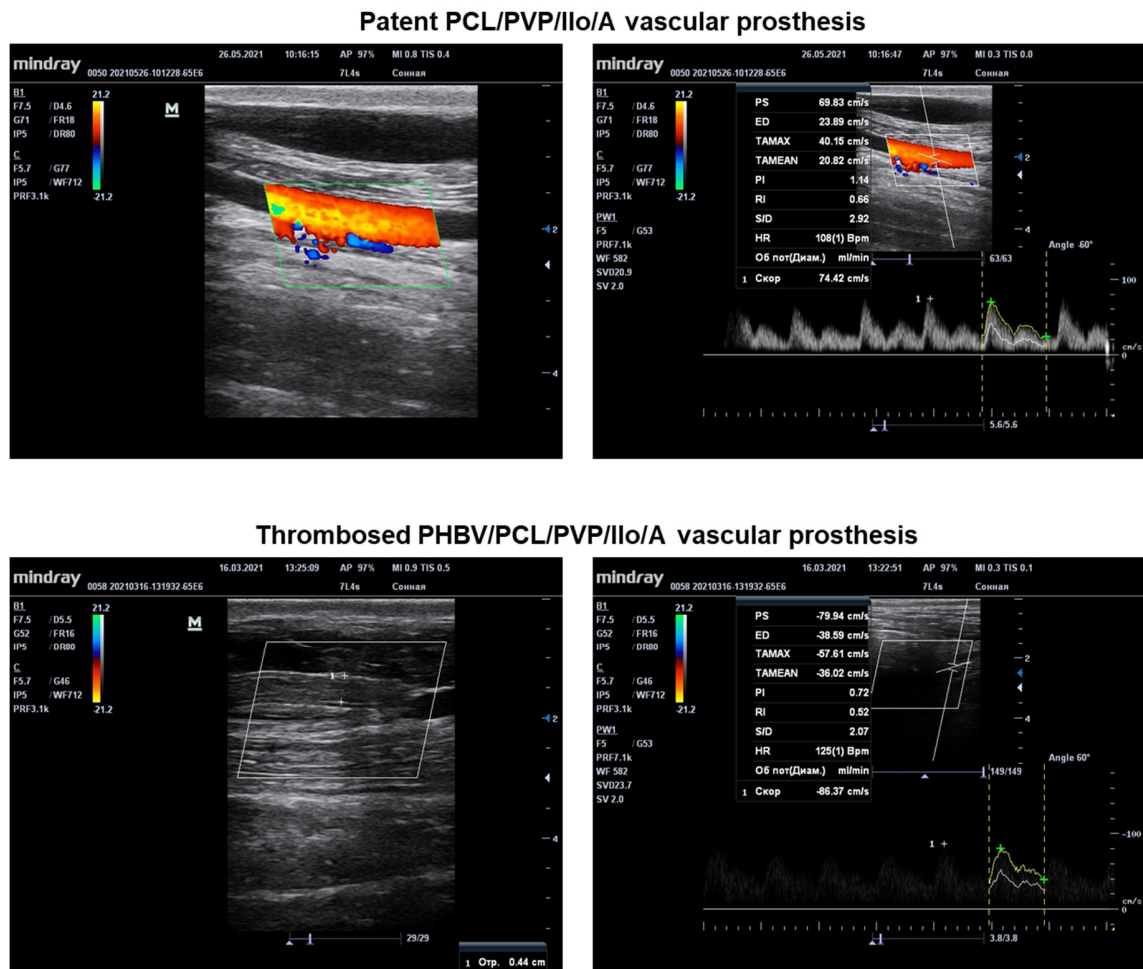

**Supplementary Figure S3.** Representative ultrasound Doppler images of patent PCL/PVP/Ilo/A and thrombosed PHBV/PCL/PVP/Ilo/A vascular prostheses into the ovine carotid artery 1 day after surgery.

Supplementary Figure S4

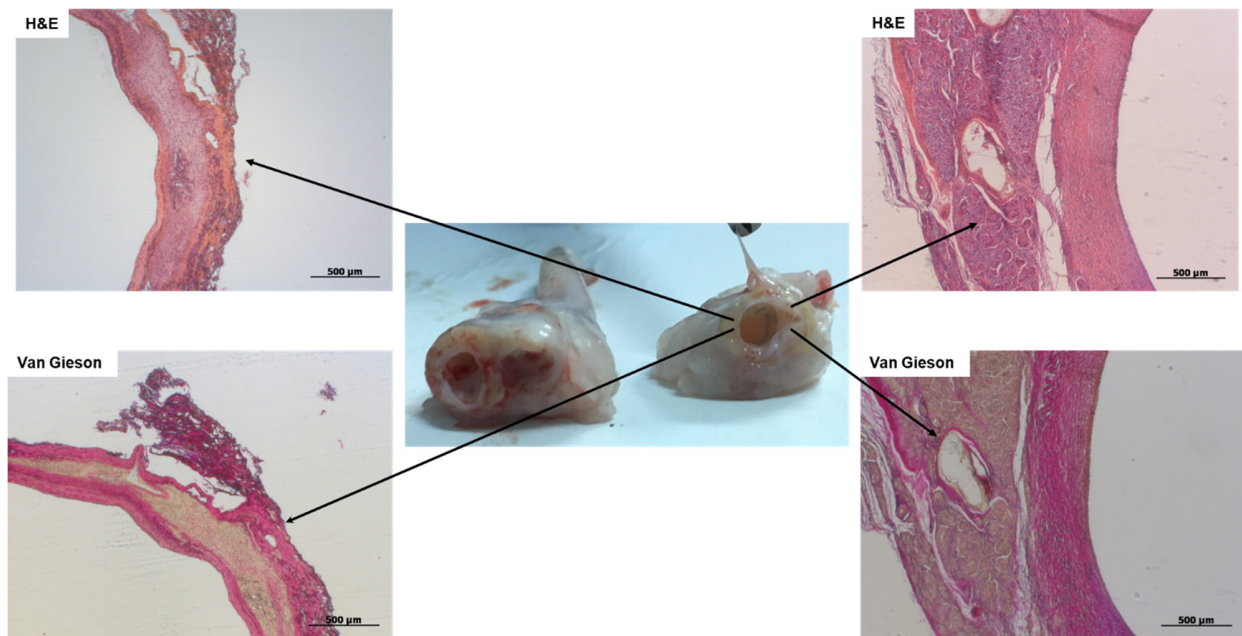

Supplementary Figure S4. Morphological observation of the PCL/PVP/Ilo/A prostheses after 6-month implantation in the ovine carotid artery: histological examination of different cross-section areas using hematoxylin and eosin (H&E) and Van Gieson staining, with a scale bar of 500  $\mu\text{m}$ .
